# Supplementary material
Source: PubMed Central journal article supplement (PMC8127034)
Supplement: biolreprod_101_2_347_s8.pdf [file biolreprod_101_2_347_s8.pdf]

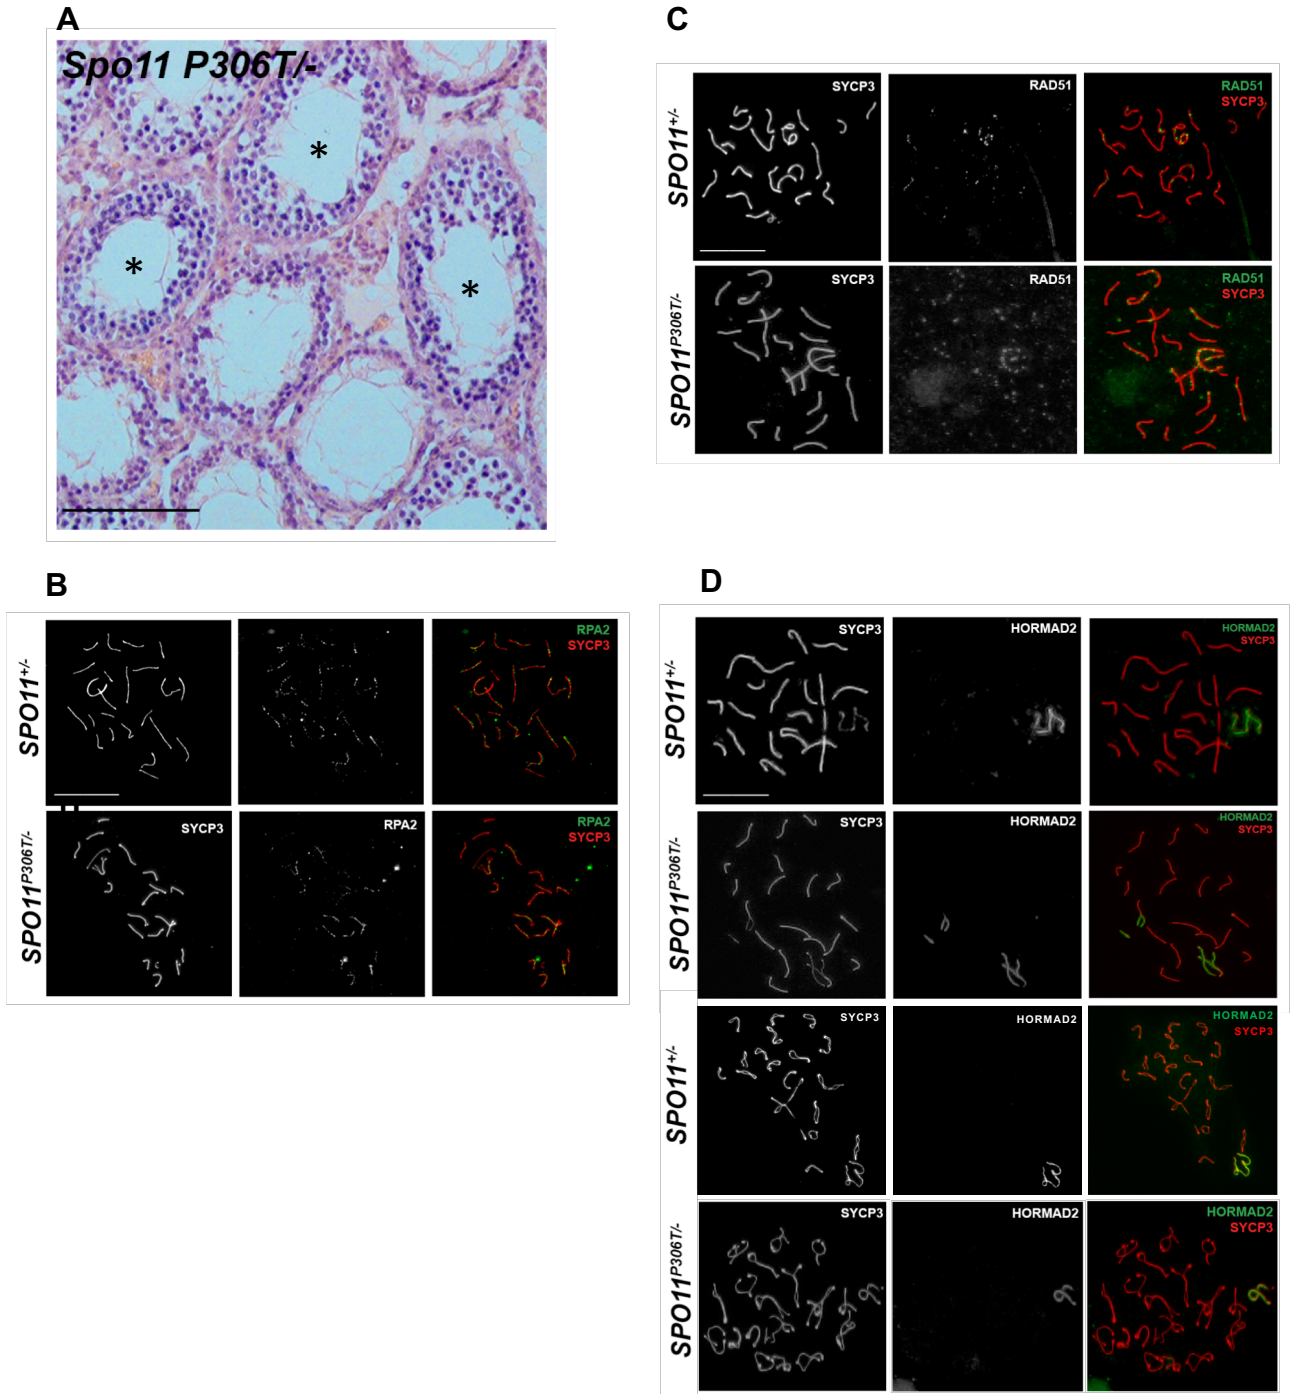

**Supplementary Figure 1.** *Spo11*<sup>P306T/-</sup> males and females are severely germ cell depleted, and spermatocytes have drastically reduced meiotic DSBs. **(A)** H&E stained testis cross-section from an eight-week old *Spo11*<sup>P306T/-</sup> male. Size bar = 75 $\mu$ m. Notice postmeiotic germ cells in all tubules. The tubules with asterisks appear to contain arrested spermatocytes. **(B, C)** Representative pachytene spermatocyte surface spread immunolabeled with RPA2 or RAD51 plus SYCP3. Quantification is plotted in Fig. 4. **(D)** Representative spermatocyte chromosome spreads immunolabeled with SYCP3 and HORMAD2 at pachynema (top two rows) and diplotene (bottom two rows). Whereas the only the XY body labels with HORMAD2, indicating asynapsed regions, there are also autosomes asynapsed at pachynema. Normal diplotene nuclei were also observed.

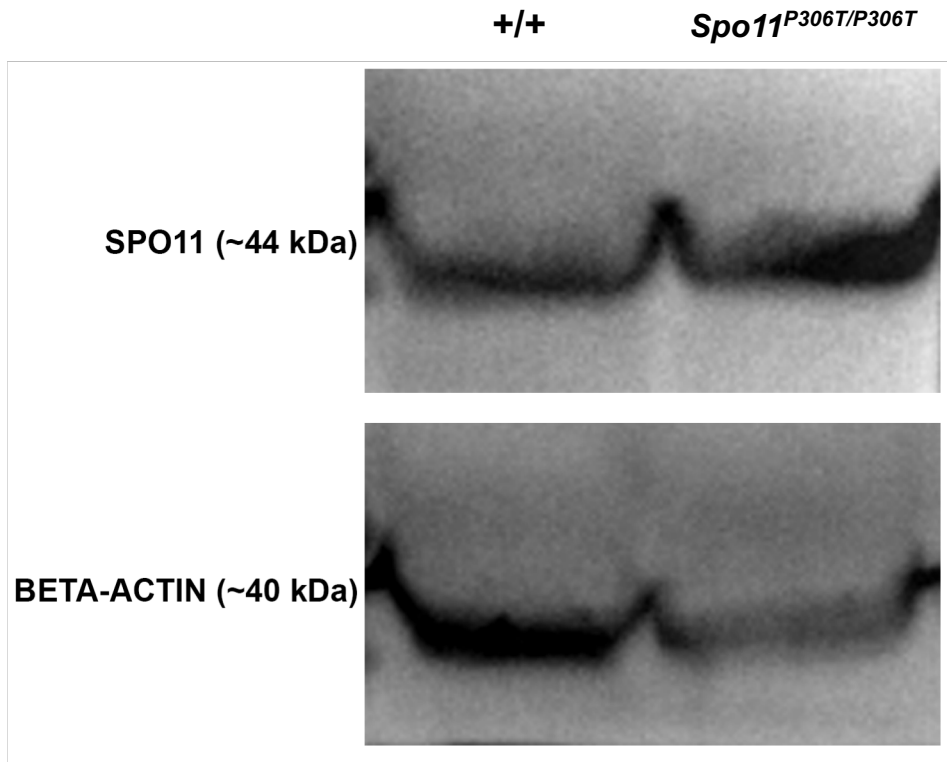

**Supplemental Figure 2.** Western blot of whole testis protein probed with anti-SPO11 antibody.

**Supplementary Table 1**

| Purpose                | Name           | Sequence (5'-3')        | Amplicon | RE Digest                                                   | Citation             |
|------------------------|----------------|-------------------------|----------|-------------------------------------------------------------|----------------------|
| Genotyping SPO11 P306T | Forward        | GTTTCACCATGCCTGGACTT    | 309 bp   | HaeIII<br>WT = 247bp, 62bp<br>P306T = 125bp,<br>122bp, 62bp |                      |
|                        | Reverse        | CCTGTAGCTCAGCCAGGTTC    |          |                                                             |                      |
| Genotyping SPO11 null  | Mutant Forward | CTGCAGGTTTGATGATTCTGT   | 200 bp   | N/A                                                         | Baudat et al. 2000   |
|                        | Mutant Reverse | CATCAGAAGCTGACTCTAGAG   |          |                                                             |                      |
|                        | WT Forward     | GCAATGCTCATTCTGTGTTG    | 200 bp   | Yes/No                                                      |                      |
|                        | WT Reverse     | GGCACTTTCAGCATAACAGGA   |          |                                                             |                      |
| Genotyping CHEK2 null  | Mutant Forward | CCAAAGAAGTCTCCGTTGCT    | 157 bp   | Yes/No                                                      | Hirao et al. 2002    |
|                        | Mutant Reverse | CAAATTAAGGGCCAGCTCATTC  |          |                                                             |                      |
|                        | WT Forward     | CCTTATGTGGTACGCCCACT    | 150 bp   | Yes/No                                                      |                      |
|                        | WT Reverse     | CCACCTCATCCAACCACT      |          |                                                             |                      |
| RT-qPCR: DDX3Y         | Forward        | GGGCGCTATATACCTCCTCAC   |          |                                                             | Royo et al. 2010     |
|                        | Reverse        | TCCAAAAGTCTGTAGGCATC    |          |                                                             |                      |
| RT-qPCR: EIF2S3Y       | Forward        | AACTATGCTGAATGGGGCAG    |          |                                                             | Royo et al. 2010     |
|                        | Reverse        | TAATTTCAATGGCAGCCAGG    |          |                                                             |                      |
| RT-qPCR: SRY           | Forward        | GAGAGCATGGAGGGCCATG     |          |                                                             | Zwingman et al. 1993 |
|                        | Reverse        | GAGTACAGGTGTGCAGCTC     |          |                                                             |                      |
| RT-qPCR: UBE2B         | Forward        | CGCCCCATCTGAAAACAACA    |          |                                                             | Royo et al. 2010     |
|                        | Reverse        | TGGGACTCCATCGATTCTGC    |          |                                                             |                      |
| RT-qPCR: USP9Y         | Forward        | ATGGCAGGTTGCACATTCAC    |          |                                                             | Royo et al. 2010     |
|                        | Reverse        | CAGTCCATCTTGATCATTTGG   |          |                                                             |                      |
| RT-qPCR: ZFY1          | Forward        | GCCAGTGCTCTCTTAAACCAA   |          |                                                             | Royo et al. 2010     |
|                        | Reverse        | TGAGTACACAAAGTCCCAGCA   |          |                                                             |                      |
| RT-qPCR: ZFY1/2        | Forward        | TGGATGAAGCATCTCCAGAA    |          |                                                             | Royo et al. 2010     |
|                        | Reverse        | CCACCAGCATCTTCATCTCC    |          |                                                             |                      |
| RT-qPCR: KDM6A         | Forward        | TACAGGCTCAGTTGTGTAACCT  |          |                                                             | Jiang et al. 2013    |
|                        | Reverse        | CTGCGGGAATTGGTAGGCTC    |          |                                                             |                      |
| RT-qPCR: MID1          | Forward        | AGAGAAACACAGAAGTGGAGACT |          |                                                             | Nakamura et al. 2017 |
|                        | Reverse        | CAGTTTGGCTTCTTGACGGG    |          |                                                             |                      |
| RT-qPCR:               | Forward        | CTCATCCTCATGTCTTCTCCG   |          |                                                             |                      |

## Supplementary Table 1

|                   |         |                       |                       |
|-------------------|---------|-----------------------|-----------------------|
| XIST              | Reverse | GATTCCAGATAGACAGGCTGG | Kobayashi et al. 2006 |
| RT-qPCR:<br>GAPDH | Forward | CTTTGTCAAGCTCATTTCTGG |                       |
|                   | Reverse | TCTTGCTCAGTGCCTTGC    |                       |

### References

1. Baudat, F., Manova, K., Yuen, J.P., Jasin, M. and Keeney, S. 2000b. Chromosome synapsis defects and sexually dimorphic meiotic progression in mice lacking *Spo11*. *Molecular Cell* 6(5), pp. 989–998.
2. Hirao, A., Cheung, A., Duncan, G., Girard, P.-M., Elia, A.J., Wakeham, A., Okada, H., Sarkissian, T., Wong, J.A., Sakai, T., De Stanchina, E., Bristow, R.G., Suda, T., Lowe, S.W., Jeggo, P.A., Elledge, S.J. and Mak, T.W. 2002. Chk2 is a tumor suppressor that regulates apoptosis in both an ataxia telangiectasia mutated (ATM)-dependent and an ATM-independent manner. *Molecular and Cellular Biology* 22(18), pp. 6521–6532.
3. Royo, H., Polikiewicz, G., Mahadevaiah, S.K., Prosser, H., Mitchell, M., Bradley, A., de Rooij, D.G., Burgoyne, P.S. and Turner, J.M.A. 2010. Evidence that meiotic sex chromosome inactivation is essential for male fertility. *Current Biology* 20(23), pp. 2117–2123.
4. Zwingman, T., Erickson, R. P., Boyer, T. and Ao, A. (1993). Transcription of the sex-determining region genes *Sry* and *Zfy* in the mouse preimplantation embryo. *Proceedings of the National Academy of Sciences of the United States of America* 90(3), 814–817.
5. Jiang, W., Wang, J. and Zhang, Y. (2013). Histone H3K27me3 demethylases KDM6A and KDM6B modulate definitive endoderm differentiation from human ESCs by regulating WNT signaling pathway. *Cell Research* 23(1), 122–130.
6. Nakamura, T., Ueyama, T., Ninoyu, Y., Sakaguchi, H., Choijookhuu, N., Hishikawa, Y., Kiyonari, H., Kohta, M., Sakahara, M., de Curtis, I., Kohmura, E., Hisa, Y., Aiba, A. and Saito, N. (2017). Novel role of Rac-Mid1 signaling in medial cerebellar development. *Development* 144(10), 1863–1875.
7. Kobayashi, S., Isotani, A., Mise, N., Yamamoto, M., Fujihara, Y., Kaseda, K., Nakanishi, T., Ikawa, M., Hamada, H., Abe, K. and Okabe, M. (2006). Comparison of gene expression in male and female mouse blastocysts revealed imprinting of the X-linked gene, *Rhox5/Pem*, at preimplantation stages. *Current Biology* 16(2), 166–172.
8. Kantha, N., Shen, L., Maskin, C., Wallace, M. and Schimenti, J. C. (2016). The chromatin remodeling component *arid1a* is a suppressor of spontaneous mammary tumors in mice. *Genetics* 203(4), 1601–1611.
